# Supplementary material
Source: MDPI journal article supplement (https://www.mdpi.com/2073-4395/12/2/434)
Supplement: s1 [file s1]

**Table S1.** The chemical composition of rice straw biochar.

| Properties       | Value (%) |
|------------------|-----------|
| pH               | 8.92      |
| Total carbon (C) | 39.11     |
| Oxygen (O)       | 42.16     |
| Hydrogen (H)     | 4.46      |
| Total nitrogen   | 0.69      |
| Phosphorus       | 0.47      |
| Potassium        | 0.52      |
| Calcium          | 0.74      |
| Magnesium        | 0.61      |
| Sodium           | 0.11      |
| Sulphur          | 1.92      |
| Zinc             | 0.12      |
| Boron            | 0.23      |
| Iron             | 0.11      |
| Copper           | 0.09      |
| H:C              | 0.16      |
| O:C              | 1.78      |
